# Interactive, visual simulation of a spatio-temporal model of gas exchange in the human alveolus

Kerstin Schmid<sup>1</sup>, Andreas Knote<sup>2</sup>, Alexander Mück<sup>2</sup>, Keram Pfeiffer<sup>3</sup>,  
Sebastian von Mammen<sup>2</sup>, and Sabine C. Fischer<sup>1</sup>

<sup>1</sup>*Supramolecular and Cellular Simulations, Center for Computational and Theoretical Biology, Faculty of Biology, University of Würzburg, Würzburg, Germany*

<sup>2</sup>*Human Computer Interaction, Institute of Computer Science, Faculty of Mathematics and Computer Science, University of Würzburg, Würzburg, Germany*

<sup>3</sup>*Behavioral Physiology & Sociobiology, Biocenter, Faculty of Biology, University of Würzburg, Würzburg, Germany*

In interdisciplinary fields such as systems biology, close collaboration between experimentalists and theorists is crucial for the success of a project. Theoretical modeling in physiology usually describes complex systems with many interdependencies. On one hand, these models have to be grounded on experimental data. On the other hand, experimenters must be able to penetrate the model in its dependencies in order to correctly interpret the results in the physiological context. When theorists and experimenters collaborate, communicating results and ideas is sometimes challenging. We promote interactive, visual simulations as an engaging way to communicate theoretical models in physiology and to thereby advance our understanding of the process of interest. We defined a new spatio-temporal model for gas exchange in the human alveolus and implemented it in an interactive simulation software named *Alvin*. In *Alvin*, the course of the simulation can be traced in a three-dimensional rendering of an alveolus and dynamic plots. The user can interact by configuring essential model parameters. *Alvin* allows to run and compare multiple simulation instances simultaneously. The mathematical model was developed with the aim of visualization and the simulation software was engineered based on a requirements analysis. Our work resulted in an integrative gas exchange model and an interactive application that exceed the current standards. We exemplified the use of *Alvin* for research by identifying unknown dependencies in published experimental data. Employing a detailed questionnaire, we showed the benefits of *Alvin* for education. We postulate that interactive, visual simulation of theoretical models, as we have implemented with *Alvin* on respiratory processes in the alveolus, can be of great help for communication between specialists and thereby advancing research.

**Keywords**— interactive simulation, visualization, theoretical modeling, lung physiology, requirements analysis, spatio-temporal resolution, education

# 1 Introduction

Systems biology is a highly interdisciplinary research field that integrates theoretical modeling and experimental data (Gavaghan et al., 2006). A key component of projects with valuable scientific progress is close cooperation between experimentalists and theorists (Byrne et al., 2006; Drubin and Oster, 2010; Welsh et al., 2006). However, this entails certain challenges. Different ways of thinking and terminologies or jargon often hinder communication between the disciplines. Ongoing efforts to bridge the gap include educational reviews (e.g. (Sharpe, 2017; Fischer, 2019)), summer schools, special research programs (<https://www.newton.ac.uk/event/cgp/>) and large multi-laboratory initiatives such as the Virtual Physiological Human (Viceconti et al., 2008) or The Virtual Brain (<https://www.thevirtualbrain.org>). Key components of these approaches are informative visualizations and the possibility of hands-on experience.

We consider communicating results of mathematical modeling in physiology. In publications, models are usually presented as follows (Mogilner et al., 2011): The model definition is given in terms of mathematical equations, occasionally supported by schematic diagrams describing the model structure. For the corresponding simulations, all parameter values are listed and the output is visualized in graphs and compared with experimental data, where appropriate. When modeling spatial structures and processes, the simulation output is presented in still images or, if possible, animations (Chao, 2003; Saber and Heydari, 2012; Lin et al., 2004). As an alternative for the communication of state of the art theoretical models, we promote interactive, visual simulation. Previous approaches include computer-aided diagnosis software (Xiong et al., 2017; Conover et al., 2018) or systems for medical education (Jacob et al., 2012; Jamniczky et al., 2012; Costabile, 2021). We focus on the human lung. Existing interactive systems for teaching in this field address respiratory mechanics (Kuebler et al., 2007; Warlich et al., 2012) or gas exchange (Kapitan, 2008). All above systems for teaching convey established educational content. They have not been intended to advance the current state of research.

In contrast, (Winkler et al., 1995) argue that their interactive system has great utility beyond its educational use. They have developed an application that provides an interactive interface with a simulation of a multi-compartment model. Ventilation mechanics, gas transport, gas mixing and gas exchange are considered. However, the actual process of gas exchange, the key functionality of the human lung, remains as abstract as the site where it occurs. We thus focused on the smallest functional unit of the lung - the alveolus - and developed an interactive, visual simulation of gas exchange. We refined and combined existing models (Weibel et al., 1993; Dash et al., 2016) to cover the complete transport of oxygen into hemoglobin. The resulting model provided the computational core for an interactive simulation software named *Alvin*. *Alvin* facilitates investigations of relationships between morphological and physiological factors and the course of gas exchange. The software enables systematic investigations of our model with respect to experimental data. The intuitive usability of *Alvin* allows its integration in research and teaching. As an exemplary use case in research, we present a plausibility check of pulmonary diffusion capacity measurements. Concerning the applicability of *Alvin* in teaching, we present the details of its integration into a digital physiology lab course for undergraduate students and the results of a corresponding survey among its participants. The software is available for download at <https://go.uni-wue.de/alvin>.

Particular about our work is the development of the mathematical model with the aim of visualization in combination with the requirements-based engineering of the simulation software. This resulted in an advanced gas exchange model and an interactive application that exceed the existing standard. Specifically, design features as the ability to run and compare multiple simulation instances at the same time and the combination of providing parameter value presets as well as allowing parameter configurations by the user are key contributions to the field. This results in an educationally valuable application that also allows revealing unknown underlying assumptions of results presented in the literature. Taken together, our work demonstrates that an interactive,

visual simulation can improve the understanding of gas exchange in the human lung, for both researchers and students.

## 2 Integrative Alveolar Gas Exchange Model

The human lung consists of progressively branching bronchi and bronchioles, and blood vessels follow this structure (Hsia et al., 2016). The respiratory zone begins where the first alveoli adjoin the bronchioles (Haefeli-Bleuer and Weibel, 1988). Alveoli are hollow protrusions that have a large surface area and a thin tissue barrier. They are surrounded by a dense network of fine capillaries (Weibel and Gomez, 1962). Within an alveolus, inhaled air passes through the cavity and gas exchange with the capillary blood takes place through the tissue barrier (Weibel, 2009). An alveolus thus represents the smallest functional unit of the lung.

### 2.1 Model

The process of gas exchange in an alveolus can be divided into two sequential steps (Roughton and Forster, 1957): 1. The diffusion of oxygen through the tissue barrier into the blood and red blood cells and 2. its binding to hemoglobin (Hb). Gas exchange leads to oxygen ( $O_2$ ) and carbon dioxide ( $CO_2$ ) pressure gradients inside the blood along capillaries surrounding the alveolus. In a healthy individual, blood enters this area with a low partial pressure of oxygen ( $pO_2$ ) and a high partial pressure of carbon dioxide ( $pCO_2$ ). Diffusion of  $O_2$  from the alveolus into the capillary and of  $CO_2$  out of the capillary into the alveolus gradually increases  $pO_2$  and decreases  $pCO_2$  until the distribution of gases reaches equilibrium (Powers and Dhamoon, 2019). Hence, the course of pressure gradients depends on the efficiency of gas diffusion and the blood flow velocity. To map  $O_2$  and  $CO_2$  pressure gradients in our model, a representative capillary was divided into subsections of equal size (Figure 1). Oxygen diffusion from the alveolar space into the different sections is calculated successively starting with the first section. Here, blood enters with a preset  $pO_2$ . The oxygen flow  $\nu$  across the barrier as a function of morphological parameters and the pressure gradient  $\Delta pO_2$  between air and blood is calculated based on Fick's diffusion law (Weibel et al., 1993), resulting in

$$\nu = DMO_2 \cdot \Delta pO_2 = K_{O_2} \cdot \frac{s}{\tau} \cdot \Delta pO_2 \quad (1)$$

The membrane diffusing capacity for oxygen  $DMO_2$  comprises the ratio between surface area  $s$  and barrier thickness  $\tau$  multiplied by the permeability coefficient  $K_{O_2}$ . The amount of oxygen reaching the next capillary section depends on the blood flow velocity. The incoming oxygen affects the  $pO_2$  of blood in that section and so on.

The quantity of  $CO_2$  diffusing out of the capillary and into the alveolus is determined via the respiratory exchange ratio from the quantity of oxygen that is taken up by the blood. The respiratory exchange ratio is defined as the amount of  $CO_2$  produced divided by the amount of  $O_2$  consumed. This ratio is assessed by analyzing exhaled air in comparison with the environmental air and its average value for the human diet is around 0.82 (Sharma et al., 2020).

The part of our mathematical model describing the binding of  $O_2$  and  $CO_2$  to hemoglobin was adopted from (Dash et al., 2016), such that

$$S_{HbO_2} = \frac{(pO_2/p50)^{nH}}{1 + (pO_2/p50)^{nH}} \quad (2)$$

Hemoglobin oxygen saturation ( $S_{HbO_2}$ ) is expressed as a Hill function depending on  $pO_2$ , the Hill coefficient  $nH$  and  $p50$ , the value of  $pO_2$  at which hemoglobin is 50 % saturated with  $O_2$ . The parameter  $nH$ , in turn, depends on  $pO_2$ . Polynomial expressions describe the dependence of  $p50$  on  $pCO_2$  in the blood, blood temperature, the pH inside erythrocytes ( $pH_{rbc}$ ) and concentration of the organic phosphate 2,3-bisphosphoglycerate ([2,3]-DPG). These dependencies have been described and fitted to several experimental data sets (Dash et al., 2016). In

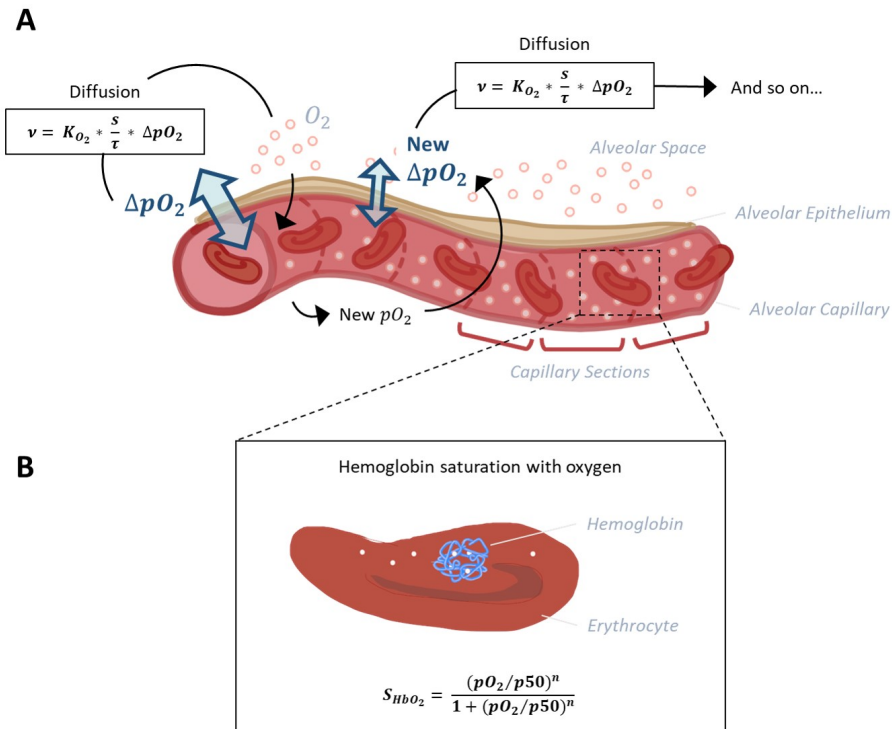

Figure 1: Schematic representation of the model capillary with erythrocytes, separated from alveolar space by a single cell layer of alveolar epithelium. **(A)** In order to reconstruct  $O_2$  and  $CO_2$  pressure gradients along the capillary, it is divided into sections of equal size. The pressure gradient between alveolar space and blood ( $\Delta pO_2$ ) and the resulting flow of oxygen along this gradient is calculated for each section subsequently, as oxygen flow into one section affects  $pO_2$  and thus  $\Delta pO_2$  of the next section. Calculation of oxygen diffusion depending on  $\Delta pO_2$  is based on Fick's law (Weibel et al., 1993). **(B)** According to the  $pO_2$  and  $pCO_2$  gradients along the capillary sections determined in step 1, hemoglobin oxygen saturation ( $S_{HbO_2}$ ) is calculated for each section. The corresponding Hill equation has been defined and fitted to experimental data (Dash et al., 2016).

our model,  $S_{HbO_2}$  is determined for each section according to the  $pO_2$  and  $pCO_2$  gradients along the capillary sections obtained from step 1.

Together, we obtain a model for the complete process of oxygen transport from inhaled air into hemoglobin in the blood with spatio-temporal resolution. All parameters essential for the model and their default values were collected from the literature and represent a normal, healthy condition (Table 1).

## 2.2 Model validation

In a first step of model validation, we analysed whether the two sub models from step 1 and step 2 had been sensibly adapted from the literature. In our model, oxygen diffusion is estimated for a single alveolus with a surface area of  $121000 \mu m^2$ . Other parameters affecting  $DMO_2$  (namely tissue barrier thickness and permeability coefficient, see Equation 1) were adopted without change.  $DMO_2$  of the whole lung in relation to body weight (bw) was estimated as  $0.079 \text{ mL}/(\text{s} \cdot \text{mmHg} \cdot \text{kg})$  (Weibel et al., 1993). To compare our model result ( $DMO_2^{(\text{model})} = 6 \cdot 10^{-9} \text{ mL}/(\text{s} \cdot \text{mmHg})$ ) with Weibel's estimate, it needs to be extrapolated to the organ scale. Multiplying  $DMO_2^{(\text{model})}$  by the number of alveoli in the human lung ( $480 \cdot 10^6$  (Ochs et al., 2004)) results in a  $DMO_2^{(\text{model, extrapolated})}$  of  $2.88 \text{ mL}/(\text{s} \cdot \text{mmHg})$ . This value is distinctly lower than the  $DMO_2$  estimated by

| Parameter                           | Unit            | Default Value                         | Reference                                                                   | Value Range     |
|-------------------------------------|-----------------|---------------------------------------|-----------------------------------------------------------------------------|-----------------|
| Alveolar pO <sub>2</sub>            | mmHg            | 100                                   | (Sharma et al., 2020)                                                       | 1 - 150         |
| Blood pO <sub>2</sub>               | mmHg            | 40                                    | (Dash et al., 2016)                                                         | 1 - 150         |
| Alveolar pCO <sub>2</sub>           | mmHg            | 40                                    | (Sharma et al., 2020)                                                       | 1 - 150         |
| Blood pCO <sub>2</sub>              | mmHg            | 45                                    | (Dash et al., 2016)                                                         | 1 - 150         |
| Surface area                        | μm <sup>2</sup> | 121000                                | (Mercer et al., 1994)                                                       | 0 - 210000      |
| Thickness of tissue barrier         | μm              | 1.11                                  | (Gehr et al., 1978; Weibel et al., 1993)                                    | 0.1 - 0.3       |
| Blood flow velocity                 | mm/s            | 1                                     | Abstracted from: (Weibel et al., 1993; Petersson and Glenny, 2014)          | 0.01 - 2        |
| Blood volume                        | μm <sup>3</sup> | 404000 (50 % "capillary recruitment") | Abstracted from: (Gehr et al., 1978; Ochs et al., 2004; Okada et al., 1992) | 1 - 880000      |
| Blood temperature                   | °C              | 37                                    | (Dash et al., 2016)                                                         | 20 - 44         |
| Erythrocyte pH (pH <sub>rbc</sub> ) |                 | 7.24                                  | (Dash et al., 2016)                                                         | 5.8 - 8.2       |
| Concentration of [2,3]-DPG          | mM              | 4.65                                  | (Dash et al., 2016)                                                         | 1 - 10          |
| Capillary length                    | μm              | 500                                   | (Weibel et al., 1993)                                                       | *not adjustable |
| Capillary volume                    | μm <sup>3</sup> | 808000                                | (Ochs et al., 2004; Gehr et al., 1978)                                      | *not adjustable |
| Capillary radius                    | μm              | 3.15                                  | (Mühlfeld et al., 2010)                                                     | *not adjustable |
| Number of capillaries               |                 | 52                                    | Calculated from capillary volume, radius and length                         | *not adjustable |

Table 1: Model parameters and their default values. Values of morphological and physiological parameters of the gas exchange model were collected from literature. All values given are mean values referring to a single alveolus.

Weibel et al., assuming a standard body weight of 70 kg:  $DMO_2^{(Weibel, bw 70 kg)} = 5.53 \text{ mL}/(\text{s} \cdot \text{mmHg})$ . This estimate has been based on morphometric studies in fully inflated, fluid-filled lungs (Weibel et al., 1993). It is recognized that in an air-filled lung, however, only about 60-70% of the alveolar surface is exposed to air (Gil et al., 1979; Bachofen et al., 1987). The default value for surface area in our model was taken from studies on perfusion-fixed, air-filled lungs (Mercer et al., 1994). Hence, our combination of parameter values for the surface area of a single alveolus (Mercer et al., 1994) and the number of alveoli in the human lung (Ochs et al., 2004) produce a result that falls short of the previous estimate. However, the discrepancy is explained by known differences in the morphometric methods used. We deliberately chose the surface value from the study on an air-filled lung to be as close as possible to the *in vivo* situation. The sub model describing hemoglobin oxygen saturation was adopted from the literature (Dash et al., 2016) without further modifications. Hb-O<sub>2</sub> dissociation curves across the different parameter ranges from this publication (Figure 4 E-H in (Dash et al., 2016)) were recreated and indicate a correct implementation of the model (Figure 2).

In a second step, the complete integrative model was validated. We used published experimental data to validate our model. A key contribution of our model is the temporal and spatial resolution. Rather than determining mean values, oxygen partial pressure and saturation gradients along the alveolar capillary are



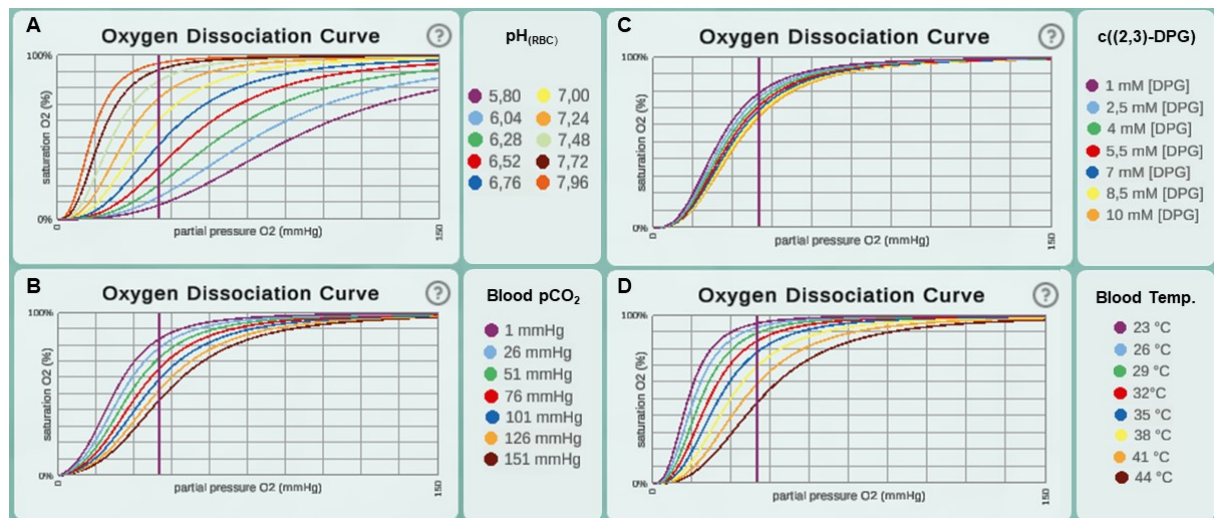

Figure 2: Oxygen dissociation curves for different ranges of parameter values from the original paper (Dash et al., 2016). This includes value ranges for the parameters **(A)** pH in erythrocytes ( $pH_{RBC}$ ), **(B)** blood  $pCO_2$ , **(C)** concentration of [2,3]-DPG and **(D)** blood temperature.

generated. This allows validation of the model in a physiological context. For default parameter settings, 50 % of the oxygenation that blood undergoes during its transit along the alveolus is completed after 0.04 s (Figure 3). This measurement was performed for an increase in saturation from 81 % to 97 %, reaching the reaction half-time at 89 %. The corresponding measurement in mice is 0.037 s (Tabuchi et al., 2013) and it has been argued that there are only slight differences between species (Lindstedt, 1984). In summary, we showed that we have correctly adopted and sensibly modified the individual models. Our new integrative model provides results that are consistent with experimental data.

## 2.3 Model discussion

Our mathematical model was assembled from two existing sub models (Weibel et al., 1993; Dash et al., 2016). One sub model describes the diffusion rate of oxygen from the air into the blood depending on morphological properties (Weibel et al., 1993). In this preceding work, the lung has been defined simplistically as a single container of air and the partial pressure of oxygen in the blood has been considered constant. Some simplifications still exist in our new model. For example, the introduction of a breathing pattern was neglected: Partial pressure changes in alveolar space only occur when respective parameter values are modified by the user (suggests that  $O_2$  diffusing out of the alveolus is instantly replaced and  $CO_2$  diffusing into the alveolus is evacuated immediately). Also, blood flow was approximated as a continuous flow of a homogeneous plasma/erythrocyte mixture. However, our new integrative model also features improvements compared to the original models. Instead of steady states, it provides information about oxygen transport over the continuous course of time. It has already been noted that a time-dependent modeling approach is better suited to reconstruct gas exchange in lung tissue than steady-state approaches (Sapoval et al., 2020). Accordingly, the temporal resolution is a valuable improvement to the model.

For validation, we compared reaction half-time results from our model with what has been reported in the literature (Tabuchi et al., 2013). Reaction half-time is defined as the time that elapses until 50 % of the oxygenation that blood undergoes during its transit along the alveolus is complete. We measured 40 ms with default parameter settings. Experimentally, a half-time of 37 ms has been determined in mice (Tabuchi et al., 2013). Corresponding theoretical predictions have been slightly lower at 18-32 ms. Tabuchi et al. argue that this discrepancy is due to the fact that the oxygenation process already takes place in the precapillary

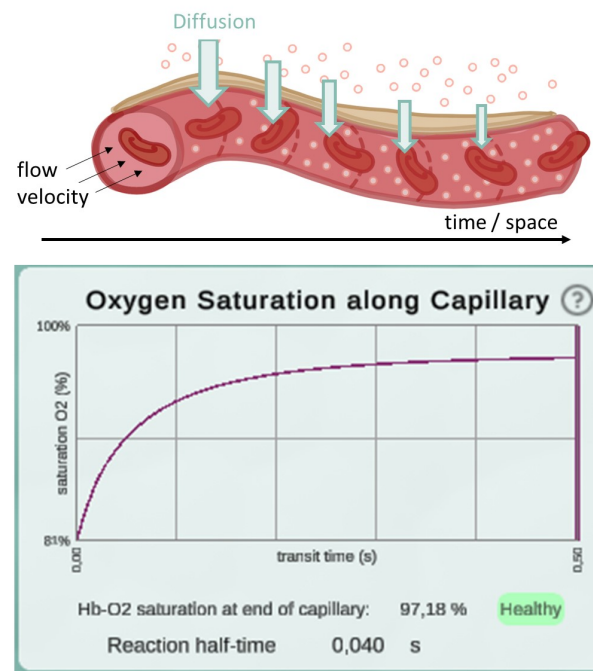

Figure 3: Illustration of the diffusion gradient along the model capillary (top) and a screenshot of the plot displaying oxygen saturation along capillary between 81 % and 97 % (bottom). This screenshot was taken from a simulation with  $pO_2$  values of 97 mmHg in the alveolar space and 46 mmHg in the deoxygenated blood. All other parameters remained at their default settings. Reaction half-time is defined as the time point at which 50 % of the oxygenation that blood undergoes during its transit along the alveolus is reached.

arterioles, but for the prediction only capillaries were considered. Since only capillaries are considered in *Alvin* as well, we may suspect that our value underestimates the *in vivo* human reaction half-time slightly.

In our model, capillaries are divided into an arbitrary number of sections. The finer grained this discretisation, i.e. the smaller the individual sections and the larger their number, the larger is the resolution of calculated gas dynamics and, thus, the resulting accuracy. However, as described in the following section, our model forms the basis of a visual simulation. With higher resolution, the computational demand grows, especially due to the three-dimensional rendering of the respective capillary sections. Therefore, we manually optimised this detail to maximise the accuracy without jeopardising the simulation's interactivity.

### 3 Visualization and Interactivity: The *Alvin* Application

Interaction with content positively influences its conception (He et al., 2021; Pike et al., 2009) and helps to explore concepts. Having established the mathematical model, we developed the *Alvin* simulation software to support the conception and exploration of the gas exchange process in a single alveolus.

#### 3.1 Requirements Analysis

We instigated the design process of the software by means of a requirements analysis. The target groups and the most important functionalities desired for this application were defined. Our core target group are scientists. *Alvin* communicates the state of the art in modeling gas exchange to colleagues in the context of research, or to undergraduate students in the context of teaching. The purpose of *Alvin* is not only to show final

simulation results, but also to enable interactions with the model parameters during the simulation. This allows the exploration of the model and testing new hypotheses. This objective implies the following requirements:

Functional requirements (FR):

- FR1 The application should be able to run on common devices.
- FR2 Quantitative and qualitative simulation output should be provided.
- FR3 The simulation should respond directly to changes in parameter values by the user.
- FR4 The connection between parameter value changes and physiology should be provided.
- FR5 The connection between parameter value changes and output should be emphasized.
- FR6 Both healthy and disease conditions should be considered, and comparisons should be possible.

Non-functional requirements (NFR):

- NFR1 The application should allow the user to enter a flow state when exploring the model behaviour.
- NFR2 The overall look and feel of the application should be professional and clean as well as appealing and responsive.

## 3.2 Visualization

*Alvin* is a desktop-based application implemented in Unity. It is available for Windows, macOS and Linux (fulfills FR1). The user interface of *Alvin* consists of the following core components: a three-dimensional model of an alveolus illustrating the simulation process, a configuration menu for model parameter values and a panel displaying dynamic graphs (Figure 4). A key feature is the ability to run and compare multiple simulation instances at the same time.

The animated, three-dimensional model of an alveolus illustrates the current state of the simulation (Figure 4, center, see also Section S.1.2 for further details). The alveolus is visually filled with small representations for air molecules, animated to signify Brownian motion. Each one is representing roughly  $2 \cdot 10^9$  molecules of oxygen (red spheres), carbon dioxide (blue spheres) or nitrogen (white spheres), respectively. Thickening or thinning of the tissue layer indicates value changes of the model parameter “thickness of tissue barrier”. Erythrocytes are animated and move along the cut-open capillary. The number of erythrocytes proportionally corresponds to a standard value of  $5 \cdot 10^6$  cells per  $\mu\text{L}$  blood (Pagana et al., 2019). Their relative position on this path is constantly tracked. Oxygen partial pressure (Equation 1) and hemoglobin oxygen saturation (Equation 2) gradients are calculated along the same path. This information is combined to color erythrocytes according to their oxygen saturation and to cumulatively total the amount of oxygen taken up by the erythrocytes over the course of the simulation (see Figure 4, graph “oxygen uptake”).

Hence, simulated gas exchange can be retraced by observing the amount of gas spheres crossing the tissue barrier from one side to the other and changes in capillary and erythrocyte coloring (FR2). Quantitative outcome of the simulation can be monitored on three different graphs (FR2)(Figure 4, right). They show hemoglobin oxygen saturation as a function of  $p\text{O}_2$  in the blood (oxygen dissociation curve), or of time (oxygen saturation along capillary). Finally, the total amount of oxygen taken up is tracked as a function of the time since the simulation was started or reset. Graphs of different simulation instances are indicated by their respective instance color.

## 3.3 Interactivity

The parameter panel (Figure 4, left) allows users to configure model parameter values. Changes in parameter values yield run-time updates in the 3D visualization and the quantitative graphs (FR3). A traffic light color code and keywords provide classification of the chosen parameter values with regard to their healthy or



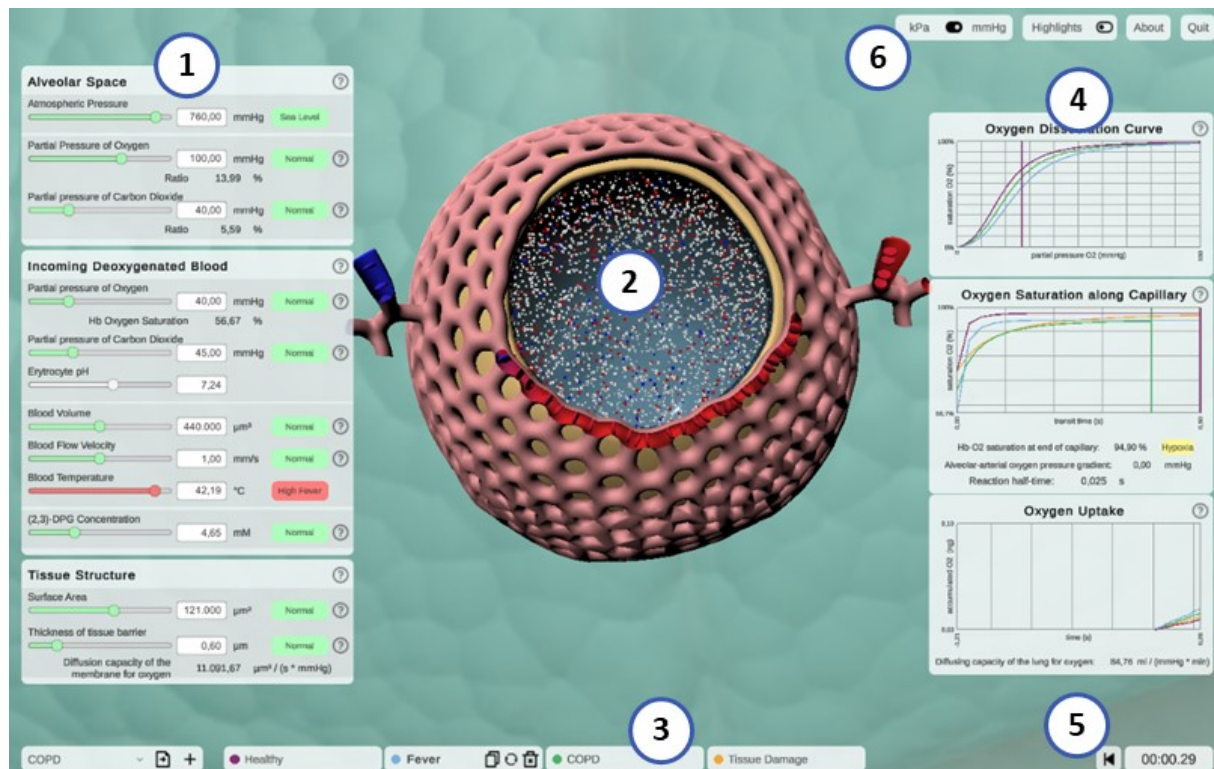

Figure 4: Screenshot of the interactive application *Alvin*. (1) Model parameters can be configured, grouped into categories. Colors and information text provide possible real-world interpretation of the values. (2) Animated simulation of an alveolus for the active parameter set provides visualization of the effect of the model parameter values. (3) To increase exploratory value, multiple simulation instances can be compared. (4) Quantitative simulation output is displayed with plots color-coded for each active instance of the simulation. (5) Simulation time is displayed and can be reset. (6) Utility functions and settings are available.

pathological ranges (FR4). More information can be obtained by clicking the respective info button (indicated by a question mark). Model parameters are grouped in terms of the tissue components to which they relate. Visual highlighting in the 3D alveolus model emphasizes these connections (FR5). For instance, all tissue components except the capillary are grayed out when the cursor is over the window for model parameters relating to the blood. To examine the process in the 3D model in more detail, it can be moved, rotated or zoomed. Detailed quantitative information can be obtained by hovering over a graph with the mouse. The instance menu allows direct comparison of different parameter settings by running several simulation instances simultaneously (FR6) (Figure 4, bottom). Characteristic coloring and custom naming facilitate distinguishing between different simulation instances. A selected instance can be copied, deleted or reset to its initial parameter values. Parameter presets for healthy and common pathogenic conditions are provided (FR6) (Table 2). Finally, the user interface contains control elements to monitor or reset simulation time and to toggle between pressure units and visual highlighting modes.

### 3.4 Discussion on visualization and Interactivity

*Alvin* intends to increase understanding of the complex relationships of gas exchange by highlighting connections and allowing comparison of multiple simulations. Previous interactive systems for gas exchange also hold their great strength in this point. (Winkler et al., 1995) have modeled the lung as a complex of abstract gas exchange units (compartments) that can be simulated under individual conditions. (Kapitan, 2008)

| Pathogenic Condition                         | Pathophysiology / Symptom                                       | Parameter Value Shift                                                                                    |
|----------------------------------------------|-----------------------------------------------------------------|----------------------------------------------------------------------------------------------------------|
| Pneumonia                                    | Fever<br>Tissue damage<br>Accumulation of fluids and dead cells | Temperature ↑<br>Surface area ↓<br>Barrier thickness ↑                                                   |
| ARDS (acute respiratory distress syndrome)   | Collapse (alveolar aelectasis)<br>Fever                         | Surface area ↓↓<br>Temperature ↑                                                                         |
| COPD (chronic obstructive pulmonary disease) | Impaired exhalation<br>Impaired exhalation<br>Tissue damage     | Alveolar pCO <sub>2</sub> ↑ and blood pCO <sub>2</sub> ↑<br>Alveolar pO <sub>2</sub> ↓<br>Surface area ↓ |
| Pulmonary fibrosis                           | Thickened and scarred connective tissue<br>Impaired inhalation  | Barrier thickness ↑<br>Alveolar pCO <sub>2</sub> ↓                                                       |
| Pulmonary embolism                           | shunt<br>shunt                                                  | Blood volume ↓↓<br>Blood flow velocity ↓↓                                                                |

Table 2: Parameter value shifts in presets representing pathogenic conditions. For every condition, pathophysiological issues or symptoms are represented by increased (↑) or decreased (↓) values of the respective model parameters.

have created a model of gas exchange that is based on the alveolar gas equation (Sharma et al., 2020) and takes the ratio of ventilation to perfusion into account. Both systems enable simulation of inhomogeneous distribution of ventilation and perfusion. This provides valuable insights into higher-level relationships. In both systems, individual gas exchange units and the whole complex are visualized by means of abstract schematic representations. What happens in detail and how it looks like remains unanswered. *Alvin* fills this gap. The site of gas exchange is no longer abstract—a 3D model illustrates an alveolus in realistic proportions. It conveys the structure of important components (capillary net, tissue barrier). The connection between structure and function is interactively explored in the simulation. Blood flow and tissue thickness in the 3D model adapt to the parameter settings and directly affect the simulation process. What further sets *Alvin* apart from the two systems mentioned above is the possibility of running multiple simulation instances simultaneously. This allows different conditions to be compared directly instead of being modeled and explored one after the other.

The combination of providing parameter value presets as well as allowing parameter configurations by the user enables a presentation of the model that expands existing best-practice (Mogilner et al., 2011). *Alvin* includes a multitude of visualization elements and interaction possibilities. They aim at an intuitive usage of the application and understanding of the gas exchange simulation. It should be assessed whether the use of *Alvin* is actually perceived as intuitive. For this purpose, in the context of a use case study (described in Section 4.2), we had a group of users fill out a standardized questionnaire to measure intuitive usability.

## 4 Applying *Alvin*: Use Case Studies

We provide two concrete examples for the application of *Alvin*. First, we demonstrate how the interactive simulation can be used to interpret data from the literature. Second, we report on *Alvin*'s integration into a university level virtual class.

### 4.1 *Alvin* in Research: Interpreting Data and Testing Predictions

To present a possible use case of *Alvin* for research, we employ the application to check the plausibility of pulmonary diffusion capacity measurements. The pulmonary diffusion capacity ( $D_{L_{O_2}}$ ) describes the lungs' capacity to transport oxygen from the air to the blood. It is defined as the oxygen consumption  $\dot{V}O_2$  in L/min (oxygen uptake over time) divided by the mean oxygen pressure gradient between alveolar air and capillary blood  $\Delta pO_2$  (Lindstedt, 1984).

$$D_{L_{O_2}} = \frac{\dot{V}O_2}{\Delta pO_2} \quad (3)$$

Physiological estimates of  $D_{L_{O_2}}$  are usually derived from measurements of diffusion capacity for carbon monoxide ( $D_{L_{CO}}$ ) (Forster, 1964; Crapo and Crapo, 1983). Normal values of  $D_{L_{O_2}}$  at rest are around 30 mL/(mmHg · min) (Hsia et al., 2016). Determination of  $D_{L_{O_2}}$  based on morphometric data has resulted in a value of 158 mL/(mmHg · min) (Weibel, 2009) and thereby exceeds physiological approximations considerably. There are several reasons for this discrepancy (Hsia et al., 2016). One of them is that for the morphological estimation, a complete perfusion of the capillaries is assumed and the entire alveolar surface is included in the calculations (Weibel, 1970). Under normal conditions, only about 50 % of capillary segments in the alveolar wall are perfused by erythrocytes and thus contribute to gas exchange (Okada et al., 1992) (Figure 5A). Increasing blood pressure (e.g. due to increased cardiac output) leads to recruitment of further capillary segments. In the perfusion fixed, air-filled lung, only about 60 % to 70 % of the alveolar surface area is exposed to air (Bachofen et al., 1987; Gil et al., 1979). In addition, lung volume changes during respiration depending on the transpulmonary pressure. It has been proposed that alveolar recruitment may be responsible for these volume changes, i.e., opening and closing of alveoli (Carney et al., 1999). However, *in situ* studies rather suggest an increase in alveolar size (D'Angelo, 1972). In terms of the model parameters in *Alvin*, both hypotheses manifest themselves in changes in the alveolar surface area available for gas exchange. A surface area of 207,000  $\mu m^2$ , measured in inflation-fixed lung tissue (Stone et al., 1992), describes a maximum surface exposure of 100 %. The default surface area setting in *Alvin* is 121,000  $\mu m^2$  and thus corresponds to an exposure of 58 %. This value was taken from a study in which the tissue was perfusion fixed (Mercer et al., 1994). Capillary recruitment in *Alvin* is reflected in capillary blood volume, for which the default value 404,000  $\mu m^3$  represents 50 % recruitment. By mimicking the ratios of capillary recruitment and alveolar surface area in *Alvin*, one can directly trace the effect on  $D_{L_{O_2}}$ . 100 % alveolar surface exposure and 100 % capillary recruitment in *Alvin* yield a  $D_{L_{O_2}}$  of 200 mL/(mmHg · min). 58 % alveolar surface exposure and 50 % capillary recruitment result in a  $D_{L_{O_2}}$  of 62 mL/(mmHg · min).

Alveolar surface area and capillary recruitment impact  $D_{L_{O_2}}$  estimates almost linearly (Figure 5B). Additionally, it is interesting to observe their synergistic effect, as ventilation and perfusion are regulated to match (reviewed in (Wagner, 1981; Petersson and Glenn, 2014)). Parallel increase of both alveolar surface exposure and capillary recruitment lead to a non-linear increase in  $D_{L_{O_2}}$ , slowly at first and then more rapidly. Consistently, anti-parallel combination of these factors yields generally low  $D_{L_{O_2}}$  estimates, with a peak at 50 % each. Quantification of this relationship in *Alvin* can be used to interpret other data from the literature. For instance,  $D_{L_{O_2}}$  has been estimated from measurements of  $D_{L_{CO}}$  and pulmonary blood flow (Kulish, 2006). To recreate these estimates, pulmonary blood flow, expressed in volume per unit time, was interpreted as alveolar blood volume in *Alvin*. Assuming a constant blood flow velocity of 1.5 mm/s, the alveolar blood volume was obtained from the mean capillary length of 500  $\mu m$  (Weibel et al., 1993) and the maximum volume of alveolar capillary bed 808,000  $\mu m^3$  (Ochs et al., 2004; Gehr et al., 1978). Under these conditions,  $D_{L_{O_2}}$  was determined in

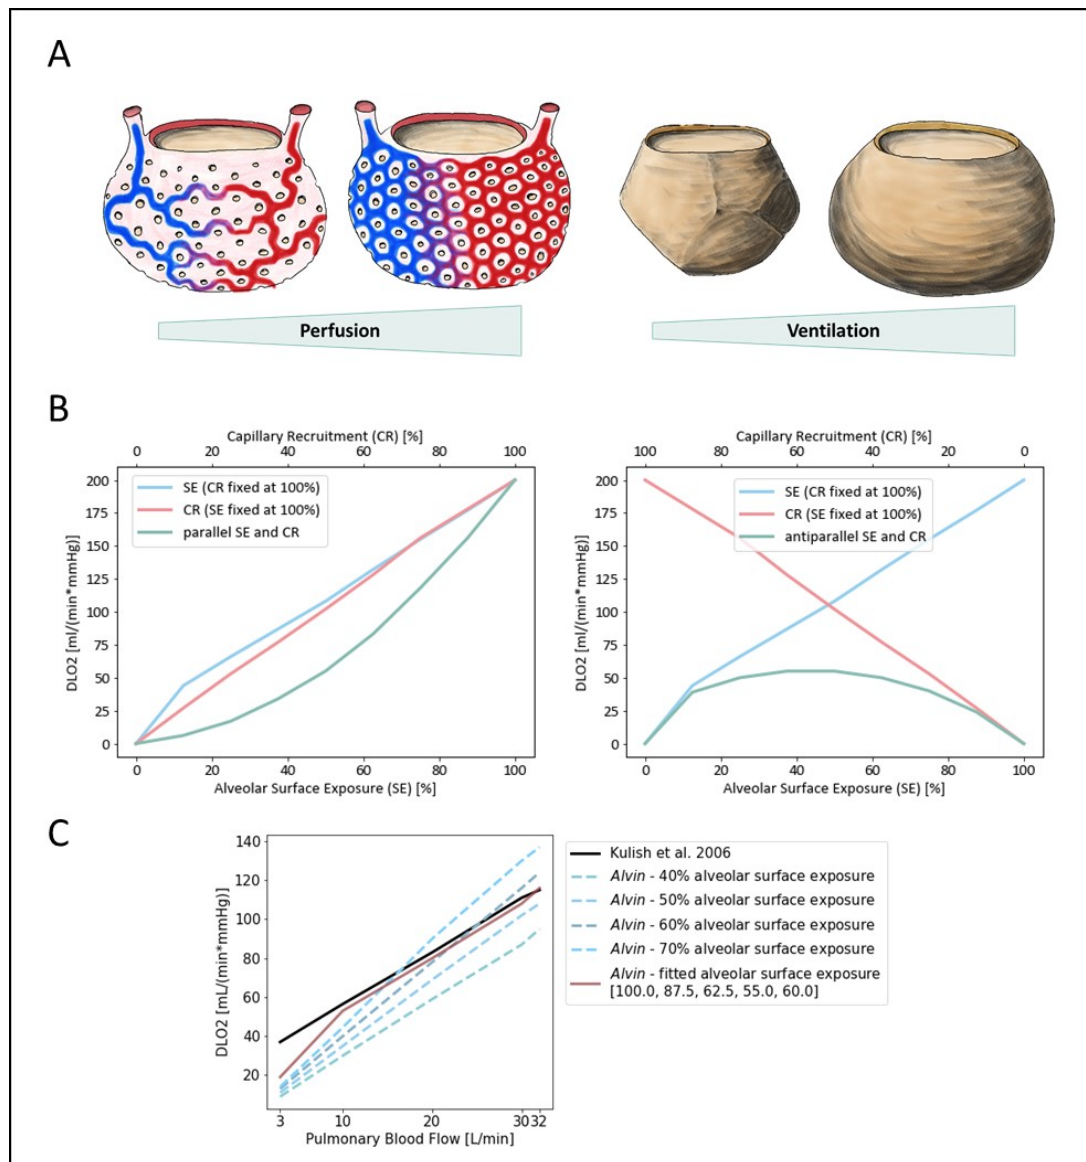

Figure 5: Diffusion capacity of the lung for oxygen ( $D_{L_{O_2}}$ ) strongly depends on perfusion and ventilation. **(A)** Illustration of capillary recruitment (left) and alveolar expansion (right). **(B)** Diffusion capacity of the lung for oxygen ( $D_{L_{O_2}}$ ) depending on capillary recruitment and alveolar expansion for a parallel (left) and antiparallel combination (right). Alveolar expansion and the ensuing surface exposure are simulated in *Alvin* by increasing alveolar surface area from 0 (0 %) to 207000  $\mu\text{m}^2$  (100 %) in steps of 12.5 %. Capillary recruitment is represented by capillary blood volume increase from 0 (0 %) to 808000  $\mu\text{m}^3$  (100 %) in steps of 12.5 % in *Alvin*. **(C)** Comparison to published  $D_{L_{O_2}}$  estimates (Kulish, 2006) (black). Pulmonary blood flow was interpreted as blood volume in *Alvin*, assuming a flow velocity of 1.5 mm/s and morphological features (mean capillary length of 500  $\mu\text{m}$  (Weibel et al., 1993) and maximum volume of alveolar capillary bed 808000  $\mu\text{m}^3$  (Ochs et al., 2004; Gehr et al., 1978)). Alveolar surface exposure was fixed at constant values (blue dashed lines) and adjusted with increasing pulmonary blood flow (red line).

*Alvin* with varying alveolar surface area settings (Figure 5C). The resulting  $D_{L_{O_2}}$  graphs all differed in slope from the published data (Kulish, 2006). Thus, Kulish's predictions did not appear to have been based on constant alveolar surface exposure. By adjusting alveolar surface area values (100, 87.5, 62.5, 55.0 and 60 %



surface exposure) along with increasing blood flow (3, 10, 20, 30 and 32 L/min), the results could finally be reconstructed. This fitting was not successful at very low blood flow values.

This is only one example of how to employ *Alvin* to investigate correlations in a broader sense or to reproduce data from the literature to gain further insight. Further questions could address the kinetics of gas exchange. One possibility would be to investigate the threshold conditions under which the blood is still sufficiently oxygenated within the transit time.

## 4.2 *Alvin* in Higher Education: Physiology Lab Course

For the application in teaching, the benefits of an interactive simulation have been perceived and exploited early on (Dewhurst et al., 1988; Davis and Mark, 1990) and are still being pursued today (Jacob et al., 2012; Tworek et al., 2013). Therefore, we integrated *Alvin* into a university level class on human biology, specifically an online practical session on blood and respiration. *Alvin* was used to support the online session by providing an interactive model of the cooperation of the bloodstream and the respiratory system. The suitability of *Alvin* for this course was measured with an online questionnaire.

The course was scheduled for 2 hours and 45 minutes. The participants consisted of students of teaching Biology, specifically of the German levels of *Grundschule* (elementary school), *Mittelschule* (secondary school) and *Gymnasium* (grammar school). After an introduction into the topic "Blood and Respiration" in the form of a 45 minute lecture, *Alvin* was presented briefly, explaining how to use the application and interpret the 3D model and graphs. Participants were given a few minutes to familiarize themselves with *Alvin*. They were then asked for feedback as they worked with the application. An online questionnaire was provided to collect responses. Participation was voluntary and could be withdrawn throughout the event. Submitting the questionnaire as a whole, or answering individual questions, was not mandatory. The questionnaire was split in four parts. The entire questionnaire, translated from German, can be found in the supplementary material (Section S.2).

The first part consisted of a generic demographic questionnaire, extended by specific questions to assess the formal background of the students and their experience with the subject. We received N = 101 submission which were at least partially answered. Of the N = 101 surveys received, 11 self-identified as male, 81 as female. The second part contained 13 different exercises addressing respiratory processes in the alveolus. These exercises provided instructions on how to integrate *Alvin* into solution approaches. Among other things, these exercises highlighted well-known relationships and phenomena such as the Bohr effect (Riggs, 1988). The mean overall score for all participants was 2.07 on a scale of (1-4 with 1 indicating perfect answers). Missing answers were graded with the score 4. Most of the exercises were solved correctly. Few answers were incorrect, most score 4 ratings were due to missing answers.

The third part consisted of two standardized questionnaires to assess the visual aesthetics and the usability of the application: Visawi-s (Visual Aesthetics of Websites Inventory- short version) (Moshagen and Thielsch, 2021) and QUESI (Questionnaire for Measuring the Subjective Consequences of Intuitive Use) (Hurtienne and Naumann, 2010). Visawi-s (Moshagen and Thielsch, 2021) captures four central aspects of aesthetics from the user's perspective: simplicity, diversity, colorfulness and craftsmanship. Participants were presented with statements targeting these four aspects. They rated them on a scale from 1 (strongly disagree) to 7 (strongly agree). The mean overall (N = 72) Visawi-s score was 5.8 (see Figure 6A). The standardized QUESI provided a measure of usability (Hurtienne and Naumann, 2010). It is based on the assumption that intuitive use is the unconscious application of prior knowledge leading to effective interaction. It can be divided into the following subscales: Subjective mental workload, perceived achievement of goals, perceived effort of learning, familiarity, and perceived error rate. The total score of the questionnaire is equal to the mean across all five subscales. Generally, higher scores represent a higher probability of intuitive use. Participants' (N = 69) assessments of the use of *Alvin* resulted in a QUESI score of 2.98 (Figure 6A). Published benchmark values for mobile devices and applications (Naumann and Hurtienne, 2010) range from 2.39 (Alcatel One Touch 311) to 4.23 (Nintendo Wii). Familiar products generally perform better in the QUESI (Naumann and Hurtienne, 2010).





### 4.3 Discussion of Use Cases

Our exemplary use cases show the applicability of *Alvin* in research and in education. We showed an investigation of the dependencies of  $D_{L_{O_2}}$  on surface area and blood flow in *Alvin*. Physiological estimates often only consider information about blood flow (Kulish, 2006). By reproducing these estimates in *Alvin*, one can draw conclusions about the alveolar surface. At particularly low blood flow values, it is not possible to reproduce the physiological estimates for  $D_{L_{O_2}}$  in *Alvin*. This could have different causes. In the logic of the model and the definition of  $D_{L_{O_2}}$ , it is ensured that  $D_{L_{O_2}}$  is zero when the blood volume is zero. The physiological estimates in (Kulish, 2006) do not seem to meet this criterion. (note: One cannot be certain, however, because in Kulish et al. (Kulish, 2006) the lowest reported value for blood flow is 3 L/min). It is possible that our model does not produce reliable results in the range of low blood volume values. Another possibility is that the derivation of  $D_{L_{O_2}}$  from  $D_{L_{CO}}$  is not reliable in low ranges. This plausibility check shows how *Alvin* can be used to support or challenge published data. Drawing on known relationships, additional information can be obtained from previous results.

We also showed that *Alvin* is helpful for communicating respiratory processes in the training of undergraduate students. Well-known processes or phenomena like the Bohr-Effect (Riggs, 1988) can be recreated in *Alvin* and compared with results reported in the literature. Interactivity of the simulation enables experimentation with the model and exploration of its limitations. This aspect was also positively highlighted by participants of the physiology lab course in free-form answers of our questionnaire. The results of the QUESI and VISAWI questionnaires on their own do not allow for quantitative conclusions on usability or aesthetics of the application. This would require comparing them to corresponding results from comparable test situations (for example, about similar systems). At this point, one can only state that the replies did not hint at unknown issues. Instead, they were aligned with our expectations that participants should be able to operate the system autonomously and find its use appealing and relatively intuitive.

In summary, the integration of *Alvin* into physiology classes at the university level was successful. Beyond that, issues were pointed out where the implementation could be optimized in the future. Prominent and consistent were requests for more time to engage with *Alvin*. We deliberately refrained from providing the application to the participants in advance of this course to avoid a mutual influence of the participants regarding their experience with *Alvin*. This was important for the evaluation with the standardized questionnaires. For general use in teaching, however, this does not have to be taken into account. On the contrary, an exchange between students about the system could increase its learning value. We conclude that *Alvin* is less suitable to be included in a single physiology lesson. Instead, we recommend that students be made aware of the app ahead of time or to invest several course sessions.

## 5 Conclusion and Outlook

Interactive, visual simulations allow communicating modeling results and thereby help to further our understanding of the process under study. We presented *Alvin*, an application for simulating gas exchange in a single alveolus. The simulation is based on a mathematical model for the entire transport process of oxygen from the air to hemoglobin of the blood. We claim that having the goal of an interactive, visual simulation in mind when developing a mathematical model is beneficial for the modeling process. It resulted in a specific requirement for the model: In order to be able to map the course of the simulation on a three-dimensional tissue model, it had to be temporally and spatially resolved. Models evolve by being revised and improved over and over again (Drubin and Oster, 2010). If one assumes that a model can be better developed the more experts review it, then it is advantageous to make the model freely and intuitively accessible.

We argue that interactive visualization offers an engaging way to communicate theoretical models to other scientists and students. When cooperating with experimenters, it is important for theorists to present their models in the most accessible way possible. This creates as large a basis for discussion as possible in order to

jointly plan further experiments or model refinements. By making model parameters intuitively configurable, any experimenter can compare his or her own measurements with the modeling results. By including undergraduate students in the target group for *Alvin*, we ensured that only a minimum of prior knowledge is required for its usage.

In the future, we plan to extend our model to encompass a system of multiple alveoli and their associated vessels. This will allow us to address further questions and complex relationships regarding gas exchange in lung tissue. It is known that the ventilation-perfusion relationship, and therefore the diffusion-perfusion relationship, has a strong influence on  $D_{L_{O_2}}$  (Hyde et al., 1967; Hammond and Hempleman, 1987). An evolution of *Alvin* that includes an alveolar sac or a whole acinus with differently ventilated and perfused alveoli can provide valuable insights. This could also be used, for example, to further investigate the hypothesis of precapillary oxygen uptake (Tabuchi et al., 2013). It states that the oxygenation process already takes place in the precapillary arterioles before the blood reaches the alveolar capillary bed.

Rather than just presenting the data that results from a newly developed model, it is worthwhile to implement the model in a way that allows for interaction. Visualizing the simulation makes the engagement with the model more intuitive and accessible to a broader target group. Empiricists and theorists look at a system from different angles. Some work in a bottom-up fashion and take local samples and draw conclusions for the overall system. Others create abstract models for the overall system top-down and try to approach the truth by introducing more and more details. Only by working closely together can these two perspectives efficiently contribute to reliable results and become a "middle-out" approach (Noble, 2008). The communication of the achieved findings or predictions plays an important role here. We contend that interactive, visual simulations of theoretical models, as we have implemented with *Alvin* on respiratory processes in the alveolus, will make an important contribution to bridging the gap between empiricists and theorists.

## Conflict of Interest Statement

The authors declare that the research was conducted in the absence of any commercial or financial relationships that could be construed as a potential conflict of interest.

## Author Contributions

*Alvin* concept and design: AK, AM, KS. Implementation of *Alvin*: AK, AM, KS. Model development and validation: KS. Planning and supervision of the use case in teaching: KP, AK, KS. Demonstration of possible application in research: KS. Supervision: SF, SvM, KP. Manuscript preparation: KS, SF, AK, SvM. All authors contributed to the article and approved the submitted version.

## Acknowledgments

We thank Andreas Hocke and Katja Hönzke for inspiring discussions and support of the project. We thank Wolfgang Kübler and Matthias Ochs for valuable feedback on *Alvin* and members of the CCTB for testing *Alvin*.

## References

H. Bachofen, S. Schurch, M. Urbinelli, and E. R. Weibel. Relations among alveolar surface tension, surface area, volume, and recoil pressure. *Journal of Applied Physiology*, 62(5):1878–1887, May 1987. ISSN 8750-7587. doi: 10.1152/jappl.1987.62.5.1878. URL <https://journals.physiology.org/doi/abs/10.1152/jappl.1987.62.5.1878>.

- H.m Byrne, T Alarcon, M.r Owen, S.d Webb, and P.k Maini. Modelling aspects of cancer dynamics: a review. Philosophical Transactions of the Royal Society A: Mathematical, Physical and Engineering Sciences, 364 (1843):1563–1578, June 2006. doi: 10.1098/rsta.2006.1786. URL <https://royalsocietypublishing.org/doi/full/10.1098/rsta.2006.1786>. Publisher: Royal Society.
- David E. Carney, Carl E. Bredenberg, Henry J. Schiller, Anthony L. Picone, Ulysse G. McCANN, Louis A. Gatto, Graeme Bailey, Mark Fillinger, and Gary F. Nieman. The Mechanism of Lung Volume Change during Mechanical Ventilation. American Journal of Respiratory and Critical Care Medicine, 160(5):1697–1702, November 1999. ISSN 1073-449X. doi: 10.1164/ajrccm.160.5.9812031. URL <https://www.atsjournals.org/doi/full/10.1164/ajrccm.160.5.9812031>. Publisher: American Thoracic Society - AJRCCM.
- Edmund Y. S Chao. Graphic-based musculoskeletal model for biomechanical analyses and animation. Medical Engineering & Physics, 25(3):201–212, April 2003. ISSN 1350-4533. doi: 10.1016/S1350-4533(02)00181-9. URL <https://www.sciencedirect.com/science/article/pii/S1350453302001819>.
- Timothy Conover, Anthony M. Hlavacek, Francesco Migliavacca, Ethan Kung, Adam Dorfman, Richard S. Figliola, Tain-Yen Hsia, Andrew Taylor, Sachin Khambadkone, Silvia Schievano, Marc de Leval, T. Y. Hsia, Edward Bove, Adam Dorfman, G. Hamilton Baker, Anthony Hlavacek, Francesco Migliavacca, Giancarlo Pennati, Gabriele Dubini, Alison Marsden, Irene Vignon-Clementel, Richard Figliola, and John McGregor. An interactive simulation tool for patient-specific clinical decision support in single-ventricle physiology. The Journal of Thoracic and Cardiovascular Surgery, 155(2):712–721, February 2018. ISSN 0022-5223. doi: 10.1016/j.jtcvs.2017.09.046. URL <https://www.sciencedirect.com/science/article/pii/S0022522317319633>.
- Maurizio Costabile. Design, implementation, and assessment of an interactive simulation to teach undergraduate immunology students hemolytic disease of the newborn. Advances in Physiology Education, 45 (2):299–306, June 2021. ISSN 1043-4046. doi: 10.1152/advan.00008.2021. URL <https://journals.physiology.org/doi/full/10.1152/advan.00008.2021>. Publisher: American Physiological Society.
- James D. Crapo and Robert O. Crapo. Comparison of total lung diffusion capacity and the membrane component of diffusion capacity as determined by physiologic and morphometric techniques. Respiration Physiology, 51(2):183–194, February 1983. ISSN 0034-5687. doi: 10.1016/0034-5687(83)90039-7. URL <https://www.sciencedirect.com/science/article/pii/0034568783900397>.
- Edgardo D’Angelo. Local alveolar size and transpulmonary pressure in situ and in isolated lungs. Respiration Physiology, 14(3):251–266, April 1972. ISSN 0034-5687. doi: 10.1016/0034-5687(72)90032-1. URL <https://www.sciencedirect.com/science/article/pii/0034568772900321>.
- Ranjan K. Dash, Ben Korman, and James B. Bassingthwaighe. Simple Accurate Mathematical Models of Blood HbO2 and HbCO2 Dissociation Curves at Varied Physiological Conditions–Evaluation and Comparison with other Models. European journal of applied physiology, 116(1):97–113, January 2016. ISSN 1439-6319. doi: 10.1007/s00421-015-3228-3. URL <https://www.ncbi.nlm.nih.gov/pmc/articles/PMC4699875/>.
- T.L. Davis and R.G. Mark. Teaching physiology through simulation of hemodynamics. In [1990] Proceedings Computers in Cardiology, pages 649–652, September 1990. doi: 10.1109/CIC.1990.144303.
- David G. Dewhurst, Guy J. Brown, and Anthony S. Meehan. Microcomputer Simulations of Laboratory Experiments in Physiology. Alternatives to Laboratory Animals, 15(4):280–289, June 1988. ISSN 0261-1929. doi: 10.1177/026119298801500403. URL <https://doi.org/10.1177/026119298801500403>. Publisher: SAGE Publications Ltd STM.

- David G. Drubin and George Oster. Experimentalist Meets Theoretician: A Tale of Two Scientific Cultures. *Molecular Biology of the Cell*, 21(13):2099–2101, July 2010. ISSN 1059-1524. doi: 10.1091/mbc.E10-02-0143. URL <https://www.ncbi.nlm.nih.gov/pmc/articles/PMC2893975/>.
- Sabine C. Fischer. An Introduction to Image-Based Systems Biology of Multicellular Spheroids for Experimentalists and Theoreticians. In Holger Huisi, editor, *Computational Biology*. Codon Publications, Brisbane (AU), 2019. ISBN 978-0-9944381-9-5. URL <http://www.ncbi.nlm.nih.gov/books/NBK550340/>.
- R. E. Forster. Diffusion of Gases. In *Handbook of Physiology*, pages 839–872. Waverly Press, 1964.
- David Gavaghan, Alan Garny, Philip K Maini, and Peter Kohl. Mathematical models in physiology. *Philosophical Transactions of the Royal Society A: Mathematical, Physical and Engineering Sciences*, 364(1842):1099–1106, May 2006. doi: 10.1098/rsta.2006.1757. URL <https://royalsocietypublishing.org/doi/full/10.1098/rsta.2006.1757>. Publisher: Royal Society.
- Peter Gehr, Marianne Bachofen, and Ewald R. Weibel. The normal human lung: ultrastructure and morphometric estimation of diffusion capacity. *Respiration Physiology*, 32(2):121–140, February 1978. ISSN 0034-5687. doi: 10.1016/0034-5687(78)90104-4. URL <http://www.sciencedirect.com/science/article/pii/0034568778901044>.
- J. Gil, H. Bachofen, P. Gehr, and E. R. Weibel. Alveolar volume-surface area relation in air- and saline-filled lungs fixed by vascular perfusion. *Journal of Applied Physiology*, 47(5):990–1001, November 1979. ISSN 8750-7587. doi: 10.1152/jappl.1979.47.5.990. URL <https://www.physiology.org/doi/abs/10.1152/jappl.1979.47.5.990>.
- Beatrice Haefeli-Bleuer and Ewald R. Weibel. Morphometry of the human pulmonary acinus. *The Anatomical Record*, 220(4):401–414, 1988. ISSN 1097-0185. doi: 10.1002/ar.1092200410. URL <https://onlinelibrary.wiley.com/doi/abs/10.1002/ar.1092200410>.
- M. D. Hammond and S. C. Hempleman. Oxygen diffusing capacity estimates derived from measured VA/Q distributions in man. *Respiration Physiology*, 69(2):129–147, August 1987. ISSN 0034-5687. doi: 10.1016/0034-5687(87)90022-3.
- Chen He, Luana Micallef, Liye He, Gopal Peddinti, Tero Aittokallio, and Giulio Jacucci. Characterizing the Quality of Insight by Interactions: A Case Study. *IEEE Transactions on Visualization and Computer Graphics*, 27(8):3410–3424, August 2021. ISSN 1941-0506. doi: 10.1109/TVCG.2020.2977634. Conference Name: IEEE Transactions on Visualization and Computer Graphics.
- Connie C. W. Hsia, Dallas M. Hyde, and Ewald R. Weibel. Lung Structure and the Intrinsic Challenges of Gas Exchange. *Comprehensive Physiology*, April 2016. doi: 10.1002/cphy.c150028. URL <https://www.ncbi.nlm.nih.gov/pmc/articles/PMC5026132/>.
- Jorn Hurtienne and Anja Naumann. QUESI A Questionnaire for Measuring the Subjective Consequences of Intuitive Use. In *Focus Theme: Play, Act and Learn*, page 536. 2010.
- Richard W. Hyde, Richard Rynes, Gordon G. Power, and Jean Nairn. Determination of Distribution of Diffusing Capacity in Relation to Blood Flow in the Human Lung\*. *Journal of Clinical Investigation*, 46(3):463–474, March 1967. ISSN 0021-9738. doi: 10.1172/JCI105548. URL <http://www.jci.org/articles/view/105548>.
- C. Jacob, S. von Mammen, T. Davison, A. Sarraf-Shirazi, V. Sarpe, A. Esmaeili, D. Phillips, I. Yazdanbod, S. Novakowski, S. Steil, C. Gingras, H. Jamniczky, B. Hallgrímsson, and B. Wright. LINDSAY Virtual Human: Multi-scale, Agent-based, and Interactive. In Joanna Kołodziej, Samee Ullah Khan, and Tadeusz



- Burczyński, editors, Advances in Intelligent Modelling and Simulation: Artificial Intelligence-Based Models and Techniques in Scalable Computing, Studies in Computational Intelligence, pages 327–349. Springer, Berlin, Heidelberg, 2012. ISBN 978-3-642-30154-4. doi: 10.1007/978-3-642-30154-4\_14. URL [https://doi.org/10.1007/978-3-642-30154-4\\_14](https://doi.org/10.1007/978-3-642-30154-4_14).
- Heather Jamniczky, Christian Jacob, Scott Novakowski, Timothy Davison, Sebastian von Mammen, Carey Gingras, Scott Steil, Mike Paget, Benedikt Hallgrímsson, and Bruce Wright. The LIND-SAY Virtual Human Project: Anatomy and Physiology Come to Life. The FASEB Journal, 26 (S1):lb28–lb28, 2012. ISSN 1530-6860. doi: 10.1096/fasebj.26.1\_supplement.lb28. URL [https://faseb.onlinelibrary.wiley.com/doi/abs/10.1096/fasebj.26.1\\_supplement.lb28](https://faseb.onlinelibrary.wiley.com/doi/abs/10.1096/fasebj.26.1_supplement.lb28). \_eprint: [https://faseb.onlinelibrary.wiley.com/doi/pdf/10.1096/fasebj.26.1\\_supplement.lb28](https://faseb.onlinelibrary.wiley.com/doi/pdf/10.1096/fasebj.26.1_supplement.lb28).
- Kent S. Kapitan. Teaching pulmonary gas exchange physiology using computer modeling. Advances in Physiology Education, 32(1):61–64, March 2008. ISSN 1043-4046. doi: 10.1152/advan.00099.2007. URL <https://journals.physiology.org/doi/full/10.1152/advan.00099.2007>. Publisher: American Physiological Society.
- Wolfgang M. Kuebler, Michael Mertens, and Axel R. Pries. A two-component simulation model to teach respiratory mechanics. Advances in Physiology Education, 31(2):218–222, June 2007. ISSN 1043-4046. doi: 10.1152/advan.00001.2007. URL <https://journals.physiology.org/doi/full/10.1152/advan.00001.2007>. Publisher: American Physiological Society.
- Vladimir Kulish. Human Respiration: Anatomy and Physiology, Mathematical Modeling, Numerical Simulation and Applications. WIT Press, 2006. ISBN 978-1-85312-944-5. Google-Books-ID: J2rQCwAAQBAJ.
- D.W. Lin, S. Johnson, and C.A. Hunt. Modeling Liver Physiology: Combining Fractals, Imaging and Animation. In The 26th Annual International Conference of the IEEE Engineering in Medicine and Biology Society, volume 2, pages 3120–3123, September 2004. doi: 10.1109/IEMBS.2004.1403881.
- S. L. Lindstedt. Pulmonary transit time and diffusing capacity in mammals. American Journal of Physiology-Regulatory, Integrative and Comparative Physiology, 246(3):R384–R388, March 1984. ISSN 0363-6119. doi: 10.1152/ajpregu.1984.246.3.R384. URL <https://journals.physiology.org/doi/abs/10.1152/ajpregu.1984.246.3.R384>. Publisher: American Physiological Society.
- R. R. Mercer, M. L. Russell, and J. D. Crapo. Alveolar septal structure in different species. Journal of Applied Physiology (Bethesda, Md.: 1985), 77(3):1060–1066, September 1994. ISSN 8750-7587. doi: 10.1152/jappl.1994.77.3.1060.
- Alex Mogilner, Leah Edelstein-Keshet, and Kerry Bloom. Guidelines for publishing papers containing theory and modeling. Molecular Biology of the Cell, 22(7):907–908, April 2011. ISSN 1059-1524. doi: 10.1091/mbc.E11-01-0088. URL <https://www.ncbi.nlm.nih.gov/pmc/articles/PMC3069014/>.
- Morten Moshagen and Meinold T. Thielsch. Facets of visual aesthetics. International Journal of Human-Computer Studies, 268(10):689–709, October 2021. ISSN 1071-5819. doi: 10.1016/j.ijhcs.2010.05.006. URL <https://www.sciencedirect.com/science/article/pii/S1071581910000777>.
- Christian Mühlfeld, Ewald R. Weibel, Ute Hahn, Wolfgang Kummer, Jens R. Nyengaard, and Matthias Ochs. Is Length an Appropriate Estimator to Characterize Pulmonary Alveolar Capillaries? A Critical Evaluation in the Human Lung. The Anatomical Record, 293(7):1270–1275, 2010. ISSN 1932-8494. doi: 10.1002/ar.21158. URL <https://anatomypubs.onlinelibrary.wiley.com/doi/abs/10.1002/ar.21158>.
- Anja Naumann and Jörn Hurtienne. Benchmarks for intuitive interaction with mobile devices. In Proceedings of the 12th international conference on Human computer interaction with mobile devices and services -

- MobileHCI '10, page 401, Lisbon, Portugal, 2010. ACM Press. ISBN 978-1-60558-835-3. doi: 10.1145/1851600.1851685. URL <http://portal.acm.org/citation.cfm?doid=1851600.1851685>.
- Denis Noble. The Orchestra: Organs and Systems of the Body. In The Music of Life: Biology Beyond Genes, pages 74–87. OUP Oxford, February 2008. ISBN 978-0-19-922836-2.
- Matthias Ochs, Jens R. Nyengaard, Anja Jung, Lars Knudsen, Marion Voigt, Thorsten Wahlers, Joachim Richter, and Hans Jørgen G. Gundersen. The number of alveoli in the human lung. American Journal of Respiratory and Critical Care Medicine, 169(1):120–124, January 2004. ISSN 1073-449X. doi: 10.1164/rccm.200308-1107OC.
- O Okada, R. G. Presson Jr, K. R. Kirk, P. S. Godbey, R. L. Capen, and W. W. Wagner Jr. Capillary perfusion patterns in single alveolar walls. Journal of Applied Physiology, May 1992. URL <https://www.physiology.org/doi/abs/10.1152/jappl.1992.72.5.1838>. PubMed: 1601793.
- Kathleen Pagana, Timothy Pagana, and Theresa Pagana. Mosby's Diagnostic and Laboratory Test Reference. Elsevier, 14 edition, 2019. URL <https://www.elsevier.com/books/mosbys-diagnostic-and-laboratory-test-reference/pagana/978-0-323-60969-2>.
- Johan Petersson and Robb W. Glenny. Gas exchange and ventilation–perfusion relationships in the lung. European Respiratory Society, 2014. doi: 10.1183/09031936.00037014. URL <https://erj.ersjournals.com/content/44/4/1023.long>.
- F. Pierigè, S. Serafini, L. Rossi, and M. Magnani. Cell-based drug delivery. Advanced Drug Delivery Reviews, 60(2):286–295, January 2008. ISSN 0169-409X. doi: 10.1016/j.addr.2007.08.029.
- William A. Pike, John Stasko, Remco Chang, and Theresa A. O'Connell. The Science of Interaction. Information Visualization, 8(4):263–274, January 2009. ISSN 1473-8716. doi: 10.1057/ivs.2009.22. URL <https://doi.org/10.1057/ivs.2009.22>. Publisher: SAGE Publications.
- Kyle A. Powers and Amit S. Dhamoon. Physiology, Pulmonary, Ventilation and Perfusion. In StatPearls. StatPearls Publishing, Treasure Island (FL), 2019. URL <http://www.ncbi.nlm.nih.gov/books/NBK539907/>.
- A F Riggs. The Bohr Effect. Annual Review of Physiology, 50(1):181–204, 1988. doi: 10.1146/annurev.ph.50.030188.001145. URL <https://doi.org/10.1146/annurev.ph.50.030188.001145>. \_eprint: <https://doi.org/10.1146/annurev.ph.50.030188.001145>.
- F. J. W. Roughton and R. E. Forster. Relative Importance of Diffusion and Chemical Reaction Rates in Determining Rate of Exchange of Gases in the Human Lung, With Special Reference to True Diffusing Capacity of Pulmonary Membrane and Volume of Blood in the Lung Capillaries. Journal of Applied Physiology, September 1957. URL <https://www.physiology.org/doi/abs/10.1152/jappl.1957.11.2.290>.
- E. M. Saber and G. Heydari. Flow patterns and deposition fraction of particles in the range of 0.1–10µm at trachea and the first third generations under different breathing conditions. Computers in Biology and Medicine, 42(5):631–638, May 2012. ISSN 0010-4825. doi: 10.1016/j.compbiomed.2012.03.002. URL <https://www.sciencedirect.com/science/article/pii/S001048251200056X>.
- Bernard Sapoval, Min-Yeong Kang, and Anh Tuan Dinh-Xuan. Modeling of Gas Exchange in the Lungs. Comprehensive Physiology, 11(1):1289–1314, December 2020. ISSN 2040-4603. doi: 10.1002/cphy.c190019. URL <https://doi.org/10.1002/cphy.c190019>.
- Sandeep Sharma, Muhammad F. Hashmi, and Bracken Burns. Alveolar Gas Equation. In StatPearls. StatPearls Publishing, Treasure Island (FL), 2020. URL <http://www.ncbi.nlm.nih.gov/books/NBK482268/>.

- James Sharpe. Computer modeling in developmental biology: growing today, essential tomorrow. Development (Cambridge, England), 144(23):4214–4225, December 2017. ISSN 1477-9129. doi: 10.1242/dev.151274.
- K. C. Stone, R. R. Mercer, P. Gehr, B. Stockstill, and J. D. Crapo. Allometric relationships of cell numbers and size in the mammalian lung. American Journal of Respiratory Cell and Molecular Biology, 6(2):235–243, February 1992. ISSN 1044-1549. doi: 10.1165/ajrcmb/6.2.235.
- Arata Tabuchi, Beata Styp-Rekowska, Arthur S. Slutsky, Peter D. Wagner, Axel R. Pries, and Wolfgang M. Kuebler. Precapillary Oxygenation Contributes Relevantly to Gas Exchange in the Intact Lung. American Journal of Respiratory and Critical Care Medicine, 188(4):474–481, June 2013. ISSN 1073-449X. doi: 10.1164/rccm.201212-2177OC. URL <https://www.atsjournals.org/doi/full/10.1164/rccm.201212-2177OC>. Publisher: American Thoracic Society - AJRCCM.
- J. Tworek, H. Jamniczky, C. Jacob, B. Hallgrímsson, and Bruce Wright. The LINDSAY Virtual Human Project: An immersive approach to anatomy and physiology. Anatomical sciences education, 2013. doi: 10.1002/ase.1301.
- Marco Viceconti, Gordon Clapworthy, and Serge Van Sint Jan. The Virtual Physiological Human - a European initiative for in silico human modelling. The journal of physiological sciences: JPS, 58(7):441–446, December 2008. ISSN 1880-6546. doi: 10.2170/physiolsci.RP009908.
- P. D. Wagner. Ventilation/perfusion relationships. Clinical Physiology (Oxford, England), 1(5):437–451, October 1981. ISSN 0144-5979. doi: 10.1111/j.1475-097x.1981.tb00911.x.
- Lilis Warliah, Arief Syaichu Rohman, and Pranoto Hidayat Rusmin. Model Development of Air Volume and Breathing Frequency in Human Respiratory System Simulation. Procedia - Social and Behavioral Sciences, 67:260–268, December 2012. ISSN 1877-0428. doi: 10.1016/j.sbspro.2012.11.328. URL <https://www.sciencedirect.com/science/article/pii/S1877042812053141>.
- Ewald R. Weibel. Morphometric estimation of pulmonary diffusion capacity: I. Model and method. Respiration Physiology, 11(1):54–75, December 1970. ISSN 0034-5687. doi: 10.1016/0034-5687(70)90102-7. URL <http://www.sciencedirect.com/science/article/pii/0034568770901027>.
- Ewald R. Weibel. What makes a good lung? Swiss Medical Weekly, 139(27-28):375–386, July 2009. ISSN 1424-7860. doi: smw-12270.
- Ewald R. Weibel and Domingo M. Gomez. Architecture of the Human Lung: Use of quantitative methods establishes fundamental relations between size and number of lung structures. Science, 137(3530):577–585, August 1962. ISSN 0036-8075, 1095-9203. doi: 10.1126/science.137.3530.577. URL <https://science.sciencemag.org/content/137/3530/577>. Publisher: American Association for the Advancement of Science Section: Articles.
- Ewald R. Weibel, William J. Federspiel, Fabienne Fryder-Doffey, Connie C. W. Hsia, Martin König, Vilma Stalder-Navarro, and Ruth Vock. Morphometric model for pulmonary diffusing capacity I. Membrane diffusing capacity. Respiration Physiology, 93(2):125–149, August 1993. ISSN 0034-5687. doi: 10.1016/0034-5687(93)90001-Q. URL <http://www.sciencedirect.com/science/article/pii/003456879390001Q>.
- Elaine Welsh, Marina Jirotko, and David Gavaghan. Post-genomic science: cross-disciplinary and large-scale collaborative research and its organizational and technological challenges for the scientific research process. Philosophical Transactions of the Royal Society A: Mathematical, Physical and Engineering Sciences, 364(1843):1533–1549, June 2006. doi: 10.1098/rsta.2006.1785. URL <https://royalsocietypublishing.org/doi/full/10.1098/rsta.2006.1785>. Publisher: Royal Society.

T. Winkler, A. Krause, and S. Kaiser. Simulation of mechanical respiration using a multicompartment model for ventilation mechanics and gas exchange. International Journal of Clinical Monitoring and Computing, 12(4): 231–239, 1995. ISSN 0167-9945. doi: 10.1007/BF01207204.

Guanglei Xiong, Peng Sun, Haoyin Zhou, Seongmin Ha, Briain Hartaigh, Quynh A. Truong, and James K. Min. Comprehensive Modeling and Visualization of Cardiac Anatomy and Physiology from CT Imaging and Computer Simulations. IEEE Transactions on Visualization and Computer Graphics, 23(2):1014–1028, February 2017. ISSN 1941-0506. doi: 10.1109/TVCG.2016.2520946. Conference Name: IEEE Transactions on Visualization and Computer Graphics.

# Supplementary Material

## S.1 Methods

### S.1.1 Implementation of *Alvin*

The application *Alvin* was built in Unity version 2020.1.16f1 (<https://unity.com/>). Unity is a platform for creating interactive real-time content. The mathematical model (see Section 2.1) provides the basis for the simulations. Parameter value changes in *Alvin* result in instantaneous updates of the visual output. All calculations are performed in the pressure unit mmHg. For the purpose of visualization, simulation time is slowed down by a factor of 40 compared to the gas exchange process *in vivo*.

### S.1.2 Three-dimensional visual model of an alveolus

The three-dimensional, mesh-based geometric model of an alveolus was created in Blender® version 2.82 (<https://www.blender.org/>). The model resembles a real alveolus not only in its general appearance, but also in proportions. The tissue barrier, consisting of alveolar lining fluid, epithelial cells and connective tissue fibers are represented by a single layer in this model. This layer forms a truncated sphere with diameter, volume and surface area comparable to the corresponding values of an alveolus reported in the literature (Table S.1). A network of hollow channels was modeled around this tissue layer, representing the capillary network enveloping the alveolus. The properties of the model network are chosen such that the relative magnitude of the volume and the surface area, as well as the relative radius and the length of the individual segments agree with the respective measured values from the literature (Table S.1). To facilitate visualisation of the blood flow, a capillary was cut open longitudinally, thereby exposing the inside of the channel. In addition, the inflow and outflow of blood is indicated with the help of additional capillaries that connect to the capillary net.

| Parameter                                  | Value from literature | Reference                                              | Blender model    |
|--------------------------------------------|-----------------------|--------------------------------------------------------|------------------|
| Alveolar diameter [ $\mu\text{m}$ ]        | 225                   | (Mercer et al., 1994)                                  | 225              |
| Alveolar volume [ $\mu\text{m}^3$ ]        | $4.2 \cdot 10^6$      | (Ochs et al., 2004)                                    | $5.4 \cdot 10^6$ |
| Alveolar surface area [ $\mu\text{m}^2$ ]  | 121000                | (Mercer et al., 1994)                                  | 150000           |
| Capillary volume [ $\mu\text{m}^3$ ]       | 808000                | abstracted from (Gehr et al., 1978; Ochs et al., 2004) | 787000           |
| Capillary surface area [ $\mu\text{m}^2$ ] | 479000                | abstracted from (Gehr et al., 1978; Ochs et al., 2004) | 335000           |
| Capillary radius [ $\mu\text{m}$ ]         | 3.15                  | (Mühlfeld et al., 2010)                                | 4.28             |
| Capillary segment length [ $\mu\text{m}$ ] | 5.92                  | (Mühlfeld et al., 2010)                                | 8.62             |

Table S.1: The visual three-dimensional model of an alveolus was created in Blender®. The size ratios were based on morphometric values from the literature.



### S.1.3 Simulation Output

In the graph panel, dynamic plots record the course of the simulation quantitatively. The plot “oxygen saturation along capillary” presents results obtained directly from the simulation calculations. The oxygen uptake, presented in another graph, is calculated assuming a standard amount of  $270 \cdot 10^6$  hemoglobin molecules per erythrocyte (Pierigè et al., 2008). Considering the parameter values from the configuration menu, but independent of the rest of the simulation, the “oxygen dissociation curve” is calculated for a range of partial pressure values of oxygen.

If several simulation instances are active at the same time, the respective results are displayed together in the graphs, while only information about the selected instance is considered in the 3D visualisation in the center.

Two different prototypes of *Alvin* were implemented for the different use cases described in this work. One prototype was adapted for educational use (Section 4.2) such that the application has two levels of different complexity. In the first level, only one simulation instance can run at a time. The second level with full complexity is unlocked by an access code. The other prototype features additional readouts. “Membrane” diffusing capacity for oxygen  $\text{DMO}_2$  and reaction half-time were required for model validation (Section 2.2). For the application example in research (Section 4.1), the output for diffusion capacity of the lung for oxygen was added. This second prototype is depicted in Figure 4 available for download at <https://go.uni-wue.de/alvin>.

## S.2 Questionnaire for Evaluation of the integration of *Alvin* in a university level physiology lab course

The questionnaire was translated from the German original.

### Demographics

In this section, we ask you to answer questions for general demographic information. These are relevant for a correct interpretation of your further answers.

1. Please indicate your age.
2. Please indicate your biological sex.
3. Do you have a visual impairment and will it be compensated for while using the system?
4. Are you affected by color vision deficiency or color blindness?
5. What handedness do you have?
6. On average, how often do you use the following media?
  - Internet
  - Computer (in general)
  - Computer games
  - Smartphone
  - Tablet
7. How would you rate your fluency in German?

In this section, we ask you to answer questions about your prior knowledge in the subject area of the course and regarding your previous educational background.

8. In the context of which study program are you attending this event?

9. What semester are you in?
10. Did you attend the Human Biology lecture in the summer semester of 2020?
11. Have you studied the literature recommended in the above lecture on the subject of respiration?
  - N.A. Campbell and J.B. Reece. *Biology*. Always learning. Pearson Deutschland, 2015. ISBN: 9783868942590.
  - Robert F. Schmidt, Florian Lang, and Manfred Heckmann. *Physiologie des Menschen*. Springer-Lehrbuch. Springer-Verlag Berlin Heidelberg, 2011. ISBN: 978-3-642-01651-6.
12. Do you have other relevant prior knowledge from other sources?
  - School
  - Apprenticeship
  - Personal initiative

## Subject-related exercises

In this group of questions, you will be given tasks that you can answer using the system. We ask you to discuss comments on the use of the app only in a joint round at the end of the event in order to minimize influencing the other participants. Now, familiarize yourself with the application. Look at how the graphs change in response to the controllers. Also observe how different disease patterns affect the values.

1. Which correlations between the course of the oxygen saturation curve ("Oxygen saturation along capillary") and the visualized simulation can you identify?

In this and the following blocks of questions, you will be given tasks to answer using the system. After each task (there are 3 tasks in total, each with subtasks), the answers will be discussed in plenary. We ask you to discuss comments on the use of the application only in a joint round at the end of the event in order to minimize influencing the other participants.

2. How does the oxygen dissociation curve change, when the body temperature rises to 40 °C (fever)?
3. How does this affect the ability of hemoglobin to bind oxygen in the lungs?
4. How does it affect the ability of hemoglobin to deliver oxygen to tissues?

Fever is normally accompanied by an increase in respiratory rate. By increasing the respiratory rate, the increased CO<sub>2</sub> produced by the increased metabolism during fever can be better exhaled. The partial pressure of CO<sub>2</sub> in the blood affects the ability of hemoglobin to bind O<sub>2</sub>.

5. By how many mmHg must the venous CO<sub>2</sub> partial pressure be lowered to achieve the same oxygen saturation at 40 °C as at 37 °?

The cruising altitude of passenger aircrafts is around 10 to 13 km. At this altitude, the partial pressure of oxygen is only between 30 and 44 mmHg. Therefore, the air pressure in the cabins of passenger aircrafts is artificially increased, but only to a level corresponding to the air pressure at about 2000-2500 m above sea level. Thus, an oxygen partial pressure of approx. 60 mmHg is achieved in venous blood.

6. What oxygen saturation does this correspond to?
7. At what alveolar pO<sub>2</sub> can a healthy person achieve this?
8. What oxygen saturation does the blood of a patient suffering from COPD reach at the same atmospheric pressure?

9. What happens to the oxygen saturation of a person suffering from COPD if he or she develops a fever during a flight?

In this block of questions, you will be given tasks to answer using the system. Please configure the application using the activation code provided in the lecture. We ask that you do not discuss comments on the use of the application until a joint round at the end of the course to minimize influencing the other participants.

10. Sometimes a lung has to be surgically removed due to a disease. What effects does this have on the oxygen saturation of the blood?

In tissues with very high metabolic rates, for example heavily used muscles, the  $\text{CO}_2$  concentration can increase.

11. How does this affect the oxygen dissociation curve?
12. How does it affect oxygen uptake in the lungs and oxygen delivery in the tissues?

Start two simulation instances with the parameters for a healthy person. Increase the partial pressure of  $\text{CO}_2$  in the arterial blood of one instance to 75 mmHg. Using the oxygen dissociation curves, measure the absorbed oxygen in the lungs and the delivered oxygen in the tissues.

13. At which blood  $\text{pCO}_2$  is more oxygen available to the tissue? This phenomenon is called the Bohr effect.

Athletes, especially high-altitude mountaineers, can adapt to conditions at high altitude by training for longer periods at low oxygen partial pressure. This increases the diphosphoglycerate (DPG) concentration in the erythrocytes. Now, we would like to understand why this is beneficial. Start a simulation instance with the parameters for a healthy subject. First, reconstruct the conditions that exist when climbing at high altitudes: Decrease atmospheric pressure until alveolar  $\text{pO}_2$  drops to a low value such as 40 mmHg. Arterial  $\text{pO}_2$  is also reduced in these conditions. Set this to 30 mmHg.

14. What is the oxygen saturation of the blood?

Duplicate the instance. Now, set the DPG concentration in one of the two instances to the maximum value (adjustment to high altitude).

15. What happens to the oxygen dissociation curve?
16. What happens to the oxygen saturation of the blood?
17. The effect you observed initially appears to be rather disadvantageous. Now, measure the oxygen saturation in the lungs and in the tissue in the respective graphs and determine the difference between these values.

The questions will now be discussed in the plenum of the event. We ask you to discuss comments on the use of the application only in a joint round at the end of the event to minimize influencing the other participants.

The phase of active use of the system is now complete. In the following, we ask you to answer questions about your user experience. This is for systematic evaluation of the system. Please note that for the first two questions a "soft" inquiry will appear if you do not answer them or answer them only partially. The corresponding groups of questions are standardized questionnaires, where a complete answer has a lot of value. Of course, you can still skip them unanswered if you wish.

## **QUESI – Questionnaire for Measuring the Subjective Consequences of Intuitive Use**

This is a standardized questionnaire (Hurtienne and Naumann, 2010). Try to base your assessment of the system solely on the use of the system (and not, for example, on the difficulty of the task itself). There are no right or wrong answers. Please answer spontaneously and do not omit any questions.

Answer scale with equidistant levels: 1 = "Fully disagree", 2 = "Mainly disagree", 3 = "Neutral", 4 = "Mainly agree", 5 = "Fully agree".

1. I could use the system without thinking about it.
2. I achieved what I wanted to achieve with the system.
3. The way the system worked was immediately clear to me.
4. I could interact with the system in a way that seemed familiar to me.
5. No problems occurred when I used the system.
6. The system was not complicated to use.
7. I was able to achieve my goals in the way I had imagined to.
8. The system was easy to use from the start.
9. It was always clear to me what I had to do to use the system.
10. The process of using the system went smoothly.
11. I barely had to concentrate on using the system.
12. The system helped me to completely achieve my goals.
13. How the system is used was clear to me straight away.
14. I automatically did the right thing to achieve my goals.

## **Visawi-s - Visual Aesthetics of Websites Inventory- short version**

This is a standardized questionnaire (Moshagen and Thielsch, 2021). On a scale of 1 (strongly disagree) to 7 (strongly agree), please rate the extent to which you agree with the following statements regarding the system.

1. The layout appears too dense. (r)
2. The layout is pleasantly varied.
3. The color composition is attractive.
4. The layout appears professionally designed.
5. The layout is easy to grasp.
6. The layout is inventive.
7. The colors do not match. (r)
8. The layout is not up-to-date. (r)
9. Everything goes together on this site.
10. The design appears uninspired. (r)
11. The choice of colors is botched. (r)

12. The site is designed with care.
  13. The site appears patchy. (r)
  14. The layout appears dynamic.
  15. The colors are appealing.
  16. The design of the site lacks a concept. (r)
  17. The layout appears well structured.
  18. The design is uninteresting. (r)
- Negatively-keyed items are indicated by (r) and are reverse-scored.

### Customized questions on the use of *Alvin*

1. On a scale of 1 (strongly disagree) to 7 (strongly agree), please rate the extent to which you agree with the following statements regarding the system.
  - I frequently changed the "Incoming Deoxygenated Blood" parameter values for completing the tasks.
  - I frequently changed the "Alveolar Space" parameter values for completing the tasks.
  - I frequently changed the "Tissue Structure" parameter values for completing the tasks.
  - The system supported me in the configuration and interpretation of the parameters.
  - I was confused by the information provided by the system.
  - Assessment of the parameter values was useful for my understanding of the processes.
  - I found the ability to create, configure, and compare multiple instances useful.
  - I found the ability to copy instances useful.
  - I found the ability to reset instances to initial configuration useful.
  - I have used the output graphs frequently during my use of the system.
  - I could easily extract the information relevant to me from the graphs.
  - I regularly read the exact numerical values of a plot using the mouse-over function.
  - I found the visual highlighting of the simulated components of the alveolus when the cursor was over a parameter group helpful.
  - I found the visual highlighting distracting.
  - I have disabled visual highlighting for most of the time I used it.
  - I found the ability to reset the simulation time helpful.
  - The mouse-over tooltips help assisted me in using the system.
2. On which device or which version(s) of the system did you use? You can use detailed information and multiple selections if, for example, you used multiple usage paths. Detailed information about the operating system (for example, "Windows 10 version 1903", "macOS 10.13"), as well as the device (for example, processor (i5-5700) or graphics card (GeForce 2 MX), or computer model (MacBookPro Late 2015)) or browser (for example, Firefox 83.0, Safari 12) is helpful, especially if problems occurred.
  - Windows Desktop (.exe)
  - macOS Desktop (.app)
  - Linux Desktop



- Browser (WebGL)
  - iOS Tablet
  - Android Tablet
  - iOS Smartphone
  - Android Smartphone
3. On a scale of 1 (strongly disagree) to 7 (strongly agree), please rate the extent to which you agree with the following statements regarding the system.
    - The system responded to my input immediately.
    - Animations were smooth and without annoying leaps.
    - The performance of the system affected my desired use.
  4. Which benefits do you see in this system compared to a traditional text book?
  5. For which topics from your previous studies would you have appreciated a comparable application?
  6. Assuming you'll be teaching physiology - Could you imagine integrating this application into your own teaching?
  7. Could you imagine using a similar system on an appropriate topic in your classes (or a similar event)?
  8. Please share general comments, suggestions and feedback.
